# Supplementary material for: Spontaneous and specific myogenic differentiation of human mesenchymal stem cells on polyethylene glycol-linked multi-walled carbon nanotube films for skeletal muscle engineering
Source: Royal Society of Chemistry journal article supplement (doi:10.1039/c5nr04303d), 2015-01-01
Supplement: c5nr04303d1.pdf [file c5nr04303d1.pdf]

## Supplementary Data:

### 1. Live/dead staining

#### Method:

The cell viability at day 1, 7, 14 and 21 was determined by a fluorescent live/dead viability/cytotoxicity kit (Invitrogen, USA) according to the manufacturer's instruction. Briefly, 2  $\mu$ M calcein-AM and 4  $\mu$ M EthD-1 were added into the hMSC samples after washing with PBS at each time point. The samples were incubated in dark at 37 °C for 45 minutes and then examined by a confocal microscope (Olympus, Japan).

#### Result:

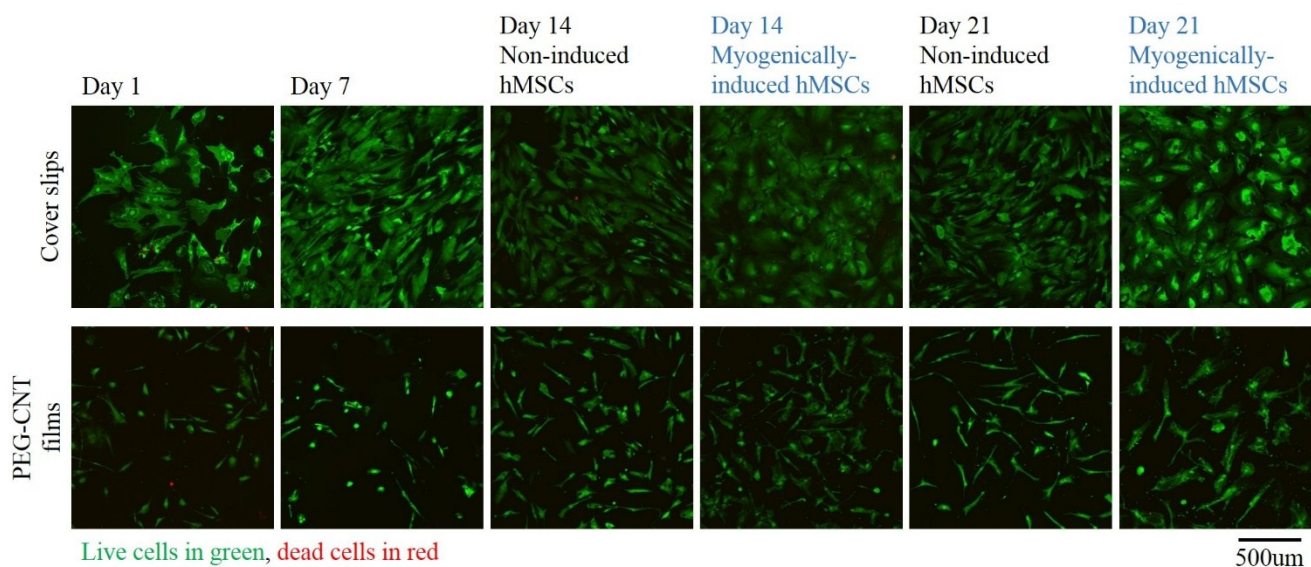

Supplementary Fig. S1. Live and dead staining of hMSCs (induced to myogenic differentiation or not) on cover slips and PEG-CNT films during 21 days incubation.

Human skeletal muscle cells (SKMCs, Lonza, Switzerland) were seeded at 3500 cells/cm<sup>2</sup> in SKGM Bullet Kit (Lonza, Switzerland). SKMCs were maintained at 37°C, 5% CO<sub>2</sub> air atmosphere and medium was replaced twice per week. Sub-culturing was conducted when cells reached 80-90% confluence with 0.25% trypsin-EDTA (Invitrogen, USA).

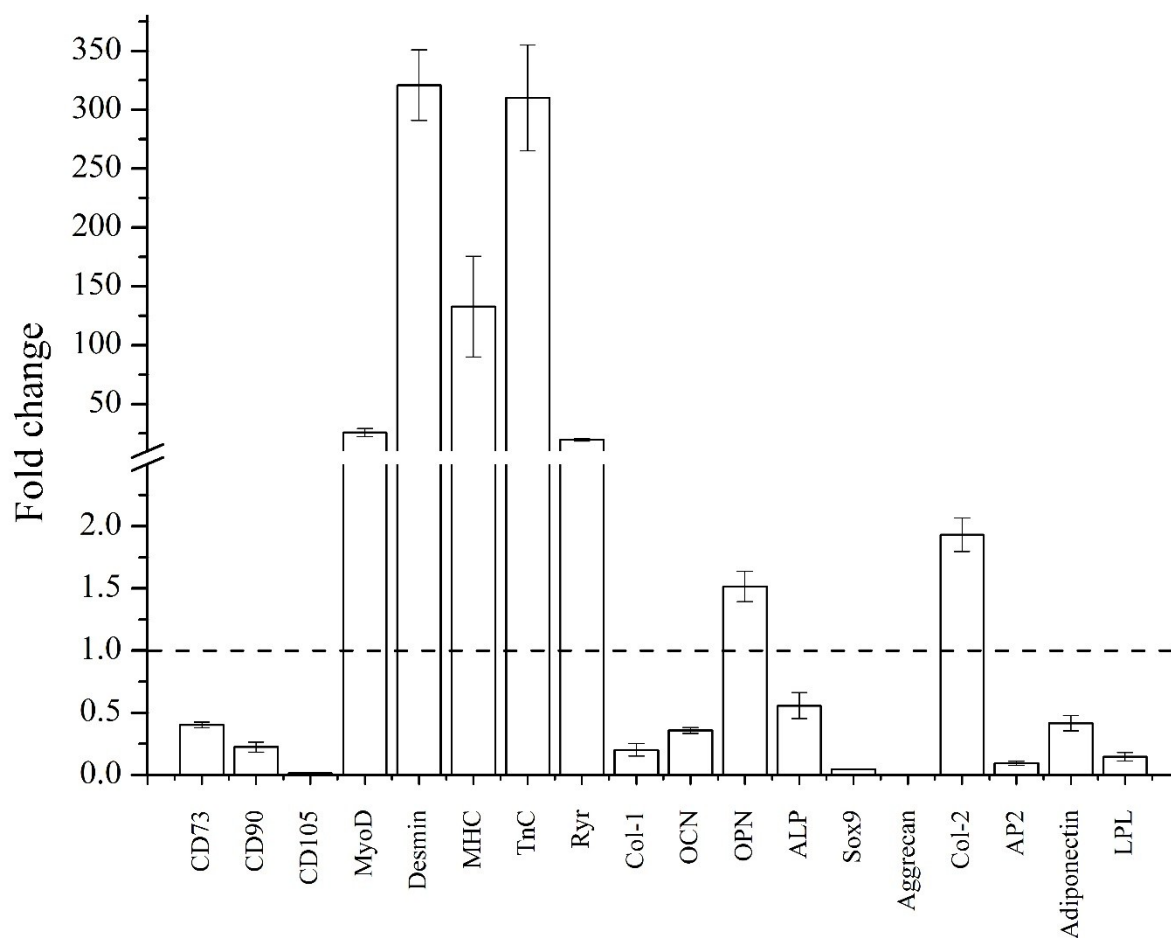

Supplementary Fig. S2. Fold change of hMSC-feature, myogenic, SKMC-specific, osteogenic, chondrogenic and adipogenic genes in SKMCs with  $2^{-\Delta\Delta CT}$ . Each gene was related to GAPDH and normalized to the negative control of non-induced hMSCs on cover slips, n=5.

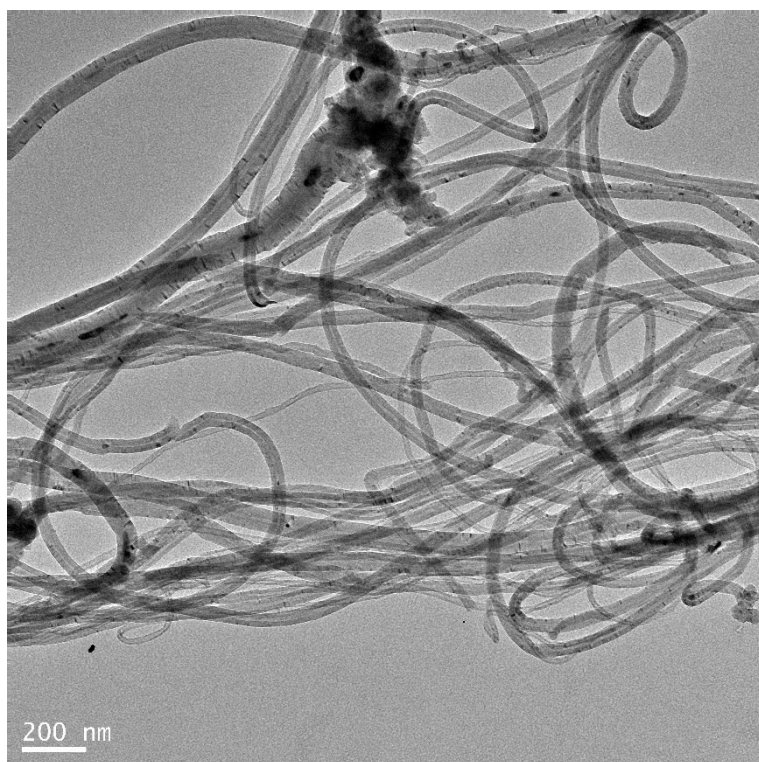

Supplementary Fig. S3. A representative TEM image of pristine CNTs.

Supplementary Table S1

*P*-value from two-way ANOVA of fold change for two variables of substrate and induction

|             | variables                |                          |                          |
|-------------|--------------------------|--------------------------|--------------------------|
| Genes       | Substrate                | Induction                | Substrate*Induction      |
| CD73        | 0.312                    | $2.308 \times 10^{-8*}$  | 0.002*                   |
| CD90        | 0.043*                   | $2.120 \times 10^{-4*}$  | 0.937                    |
| CD105       | 0.314                    | $1.233 \times 10^{-6*}$  | 0.373                    |
|             |                          |                          |                          |
| MyoD        | $2.980 \times 10^{-8*}$  | 0.167                    | $4.530 \times 10^{-4*}$  |
| Desmin      | $3.615 \times 10^{-6*}$  | 0.503                    | 0.949                    |
| MHC         | $9.919 \times 10^{-7*}$  | 0.502                    | 0.994                    |
| TnC         | $3.279 \times 10^{-8*}$  | 0.259                    | 0.024*                   |
| Ryr         | $9.118 \times 10^{-5*}$  | 0.092                    | 0.413                    |
|             |                          |                          |                          |
| Col-I       | 0.006*                   | 0.096                    | 0.609                    |
| OCN         | 0.807                    | 0.088                    | 0.001*                   |
| OPN         | $5.995 \times 10^{-8*}$  | 0.023*                   | 0.276                    |
| ALP         | 0.004*                   | $2.069 \times 10^{-5*}$  | 0.056                    |
|             |                          |                          |                          |
| Sox9        | $1.086 \times 10^{-9*}$  | $1.595 \times 10^{-14*}$ | $1.086 \times 10^{-9*}$  |
| Aggrecan    | 0.005*                   | 0.113                    | 0.002*                   |
| Col-II      | 0.302                    | 0.911                    | 0.361                    |
|             |                          |                          |                          |
| AP2         | 0.002*                   | $5.549 \times 10^{-7*}$  | 0.734                    |
| Adiponectin | 0.090                    | 0.495                    | 0.225                    |
| LPL         | $4.712 \times 10^{-10*}$ | $1.387 \times 10^{-12*}$ | $5.022 \times 10^{-10*}$ |

\*indicated significant difference if  $P < 0.05$
